# Supplementary material for: A neural circuit for competing approach and defense underlying prey capture
Source: PubMed Central journal article supplement — Proc Natl Acad Sci U S A. 2021 Apr 5;118(15):e2013411118. doi: 10.1073/pnas.2013411118 (PMC8053977; doi:10.1073/pnas.2013411118), 2021-04-05
Supplement: pnas.2013411118.sapp.pdf [file pnas.2013411118.sapp.pdf]

## Supplementary Information

### Video Legends

**Video 1.** Representative defensive and predatory behaviors of mice towards a cockroach.

**Video 2.** Representative defensive and predatory behaviors of *Gad2::Cre* mice implanted with microendoscope in LHA.

**Video 3.** Representative predatory behaviors induced by LHA *Gad2+* neuron stimulation.

**Video 4.** Representative effect of LHA *Gad2+* neuron stimulation in the feeding test.

### Supplementary Figure Legends

**Figure S1.** (A) Latency to attack a cockroach for female and male mice on day 1 and 5 of predation training (sex factor:  $F[1, 28] = 0.00231$ ,  $P = 0.96$ ; day factor:  $F[1, 28] = 13.4$ ,  $P = 0.0010$ ). (B) Latency to attack a cockroach (sex factor:  $F[1, 28] = 0.18$ ,  $P = 0.66$ ; day factor  $F[1, 28] = 60.8$ ,  $P < 0.0001$ ). (C) Predatory bout mean duration (sex factor:  $F[1, 25] = 1.58$ ,  $P = 0.220$ ; day factor:  $F[1, 25] = 21.9$ ,  $P < 0.0001$ ). (D) Time spent cornering during the first 20 min of test (sex factor:  $F[1, 28] = 0.430$ ,  $P = 0.518$ ; day factor:  $F[1, 28] = 24.8$ ,  $P < 0.0001$ ). (E) Schematic of GRIN lens placements in LHA. LHA: *lateral hypothalamus*, f: *fornix*, mt: *mamillary tract*, ZI: *zona incerta*, VMH: *ventromedial hypothalamus*, DMH: *dorsomedial hypothalamus*. (F) Histogram of the P-values obtained in a bootstrap test. The positions of the attack events in each recording were scrambled and the P-value of the change in activity at the randomized events calculated for each neuron. The process was repeated 100 times. The 100 P-values of each neuron are reported in the histogram. The vertical red dashed line represents the  $P = 0.02$  cutoff (female:  $N = 8$ , male:  $N = 8$  [except in C, day 1 – female:  $N = 7$ , male,  $N = 6$ ]; two-way ANOVA sex-by-day with Bonferroni *post hoc* test; \* $P < 0.05$ , \*\* $P < 0.01$ , \*\*\* $P < 0.001$ ).

**Figure S2.** (A) Schematic of optic fibers placements in the LHA (Orange: ChR2, Black: Control). (B) Schematic of injection area of AAV-*hSyn::DIO-hM4D-ires-mCherry* and AAV-

*hSyn::DIO-mCherry* in LHA (dark red: estimated injection area, light red: virus spreading area). (C) Percentage of time spent eating (left) and biting the food pellet (center) or petri dish (left) in control animals. (D) Locomotion time ( $P = 0.81$ ) and (E) digging time ( $P = 0.0006$ ) in the stimulation chamber in ChR2 and control animals (Mann-Whitney test)

**Figure S3.** (A) PAG section showing ChR2 reporter expression in LHA *Gad2+* projections (Right: magnification of lPAG, Blue: DAPI staining). (B) (left) Schematic of AAV5-*Efla::DIO-ChR2-EYFP* and AAV5-*Efla::DIO-EYFP* injection area in the LHA (dark green: estimated injection area, light green: virus spreading area) and (right) optogenetic fibers placement in the PAG (Orange: ChR2, Blue: control). (C) Schematic of GRIN lens placements in the PAG. (D) Histogram of P-values obtained in a bootstrap test. The positions of the attack events in each recording were scrambled and the P-value of the change in activity at the randomized events calculated for each neuron. The process was repeated 100 times. The 100 P-values of each neuron are reported in the histogram. The vertical red dashed line represents the  $P = 0.02$  cutoff.

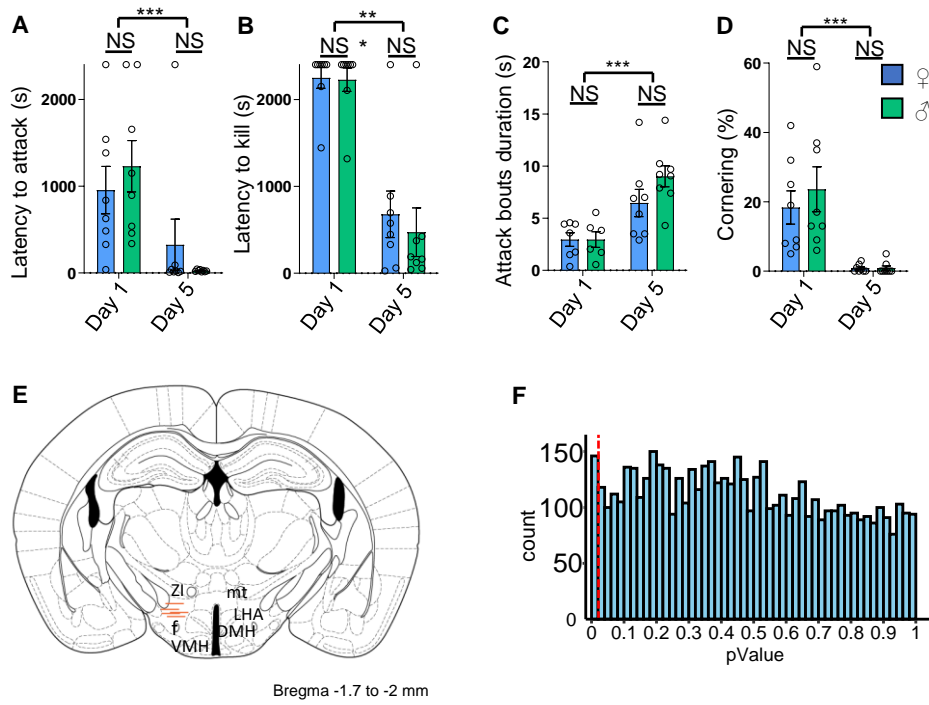

Supplementary Figure 1

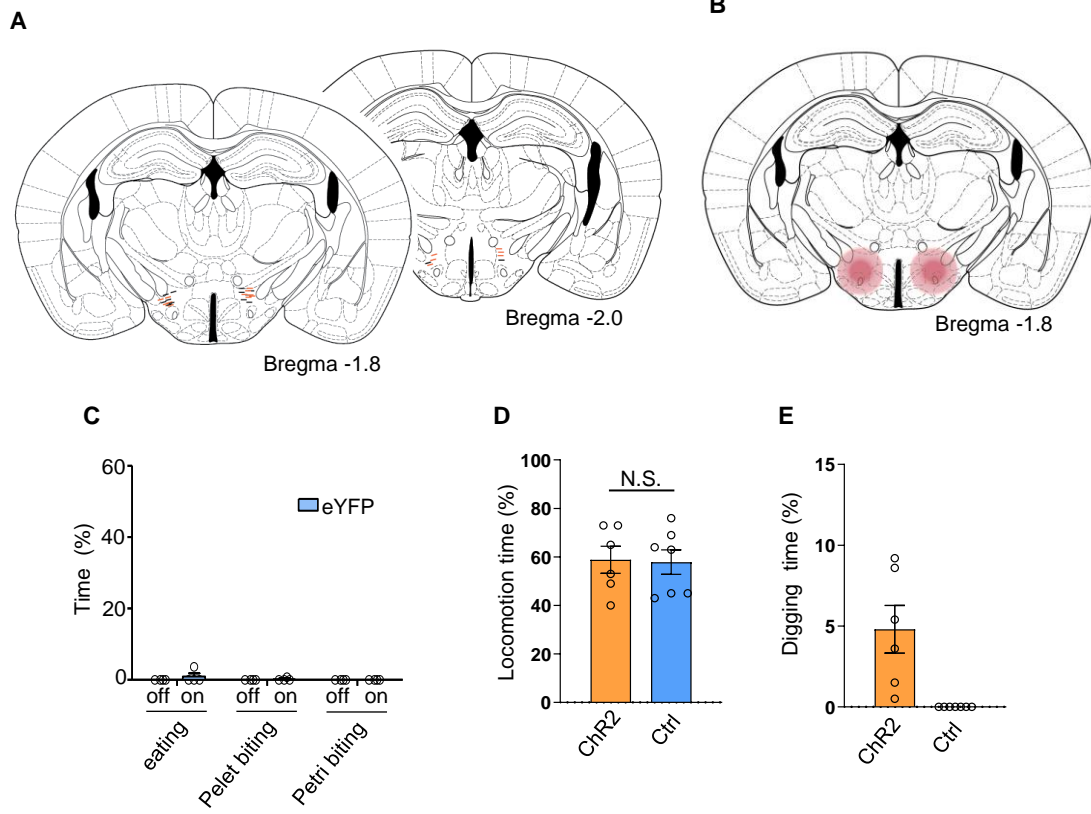

Supplementary Figure 2

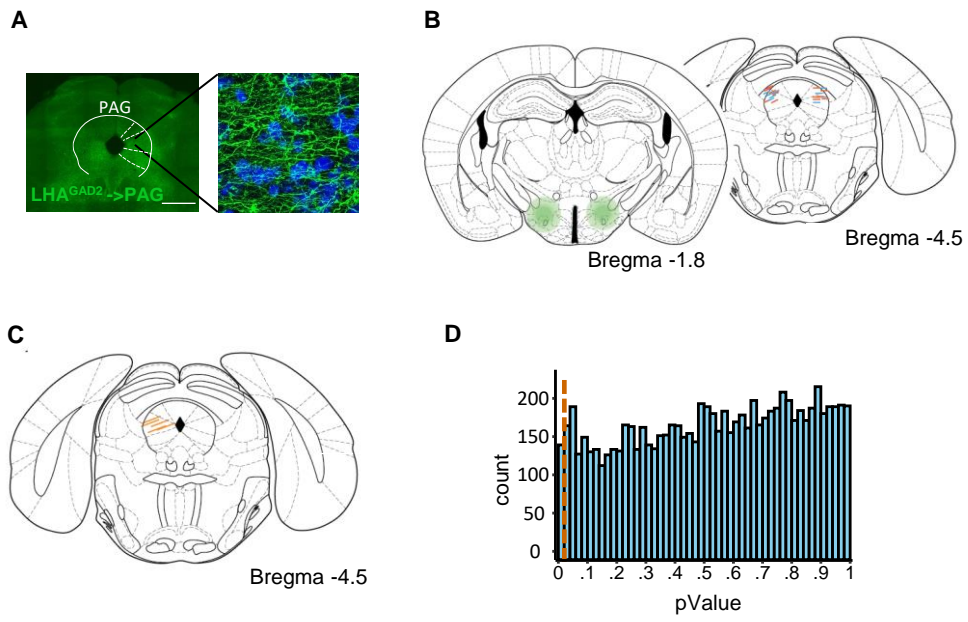

Supplementary Figure 3
